# Supplementary material
Source: HighWire-hosted journal article supplement (https://bmjopen.bmj.com/content/15/1/e093017)
Supplement: inline-supplementary-material-1 [file inline-supplementary-material-1.pdf]

**Content**

Table S1 Search Terms

Table S2 General characteristics of the included studies

Table S3 Cochrane Risk of Bias Assessment Form

Figure S1 PRISMA workflow

Figure S2a Obesity stratified meta-analysis on the association of changes in physical activity with serum creatinine.

Figure S2b Exercise duration stratified meta-analysis on the association of changes in physical activity with serum creatinine.

Figure S2c. Funnel plot of studies on the association of changes in physical activity with serum creatinine

Figure S2d Leave-one-out figure of studies on the association of changes in physical activity with serum creatinine

Figure S2e Cumulative meta-analysis of the association of changes in physical activity with serum creatinine

Figure S3a Obesity stratified meta-analysis on the association of changes in physical activity with plasma renin activity

Figure S3b Exercise duration stratified meta-analysis on the association of changes in physical activity with plasma renin activity

Figure S3c Age stratified meta-analysis on the association of changes in physical activity with plasma renin activity

Figure S3d. Funnel plot of studies on the association of changes in physical activity plasma renin activity

Figure S3e. Leave-one-out figure of studies on the association of changes in physical activity with plasma renin activity

Figure S3f. Cumulative meta-analysis on the association of changes in physical activity with plasma renin activity

Figure S4a Obesity stratified meta-analysis on the association of changes in physical activity with urea

Figure S4b Funnel plot of studies on the association of changes in physical activity with urea

Figure S4c Leave-one-out figure of studies on the association of changes in physical activity with urea

Figure S4d Cumulative meta-analysis on the association of changes in physical activity with urea

**Table S1 Search Terms****Ovid MEDLINE(R) and In-Process, In-Data-Review & Other Non-Indexed Citations , 1946 Year**

| Steps | Terms                                                                                                                              | Hits    |
|-------|------------------------------------------------------------------------------------------------------------------------------------|---------|
| 1     | exp physical activity/ or exp exercise test/                                                                                       | 291234  |
| 2     | exp physical education/ or exp physical fitness/ or exp cardiorespiratory fitness/                                                 | 47746   |
| 3     | (exercise* or sport* or walking* or cycling or swimming or running or jogging or sedentary or inactiv*).ti,ab.                     | 974933  |
| 4     | (physical* adj3 (activ* or inactiv* or treat* or exercis* or exertion*)).ti,ab.                                                    | 189257  |
| 5     | or/1-4                                                                                                                             | 1150170 |
|       |                                                                                                                                    |         |
| 6     | (controlled clinical trial).ti,ab.                                                                                                 | 18436   |
| 7     | exp clinical trial/                                                                                                                | 960936  |
| 8     | (randomized controlled trial).ti.                                                                                                  | 58191   |
| 9     | (randomized or trial).ti.                                                                                                          | 353729  |
| 10    | exp cohort studies/                                                                                                                | 2439066 |
| 11    | (retrospective or prospective or longitudinal).ti.                                                                                 | 346157  |
| 12    | or/6-11                                                                                                                            | 3359654 |
| 13    | 5 and 12                                                                                                                           | 172209  |
|       |                                                                                                                                    |         |
| 14    | (exp animal/ or nonhuman/) not exp human/                                                                                          | 5086829 |
| 15    | 13 not 14                                                                                                                          | 170034  |
|       |                                                                                                                                    |         |
| 16    | (interven* or change* or traject* or shift* or switch* or alternat* or differen* or variat* or revamp*).ti,kw.                     | 1810596 |
| 17    | 15 and 16                                                                                                                          | 19570   |
|       |                                                                                                                                    |         |
| 18    | (uremi* or uraemi* or albuminuria* or proteinuria* or urin* or albumin* or protein* or glomerular filtration rate* or ?GFR).ti,ab. | 4047257 |
| 19    | exp kidney/ or exp proteinuria/                                                                                                    | 400331  |
| 20    | (kidney or renal or disease or insufficien* or failure* or nephro*).ti,ab.                                                         | 5132016 |
| 21    | or/18-20                                                                                                                           | 8407973 |
| 22    | (kidney or renal).mp. and (transplan* or graft*).ti.                                                                               | 94451   |
| 23    | 21 not 22                                                                                                                          | 8319260 |
|       |                                                                                                                                    |         |
| 24    | 17 and 23                                                                                                                          | 4571    |
| 25    | (conference abstract or conference paper or conference review).pt.                                                                 | 0       |
| 26    | 24 not 25                                                                                                                          | 4571    |
| 27    | editorial/ or letter/ or case reports/ or comment/ or note/                                                                        | 4217780 |
| 28    | 26 not 27                                                                                                                          | 4540    |

**Embase 1947-Present, updated daily**

| <b>Steps</b> | <b>Terms</b>                                                                                                                       | <b>Hits</b>  |
|--------------|------------------------------------------------------------------------------------------------------------------------------------|--------------|
| 1            | exp physical activity/ or exp exercise test/                                                                                       | 623139       |
| 2            | exp physical education/ or exp physical fitness/ or exp cardiorespiratory fitness/                                                 | 65532        |
| 3            | (exercise* or sport* or walking* or cycling or swimming or running or jogging or sedentary or inactiv*).ti,ab.                     | 1279181      |
| 4            | (physical* adj3 (activ* or inactiv* or treat* or exercis* or exertion*)).ti,ab.                                                    | 260815       |
| 5            | or/1-4                                                                                                                             | 1707972      |
| 6            | (controlled clinical trial).ti,ab.                                                                                                 | 24269        |
| 7            | exp clinical trial/                                                                                                                | 1820578      |
| 8            | (randomized controlled trial).ti.                                                                                                  | 71118        |
| 9            | (randomized or trial).ti.                                                                                                          | 499542       |
| 10           | exp cohort studies/                                                                                                                | 962599       |
| 11           | (retrospective or prospective or longitudinal).ti.                                                                                 | 484101       |
| 12           | or/6-11                                                                                                                            | 3118564      |
| 13           | 5 and 12                                                                                                                           | 193380       |
| 14           | (exp animal/ or nonhuman/) not exp human/                                                                                          | 7826893      |
| 15           | 13 not 14                                                                                                                          | 190775       |
| 16           | (interven* or change* or traject* or shift* or switch* or alternat* or differen* or variat* or revamp*).ti,kw.                     | 2269582      |
| 17           | 15 and 16                                                                                                                          | 22019        |
| 18           | (uremi* or uraemi* or albuminuria* or proteinuria* or urin* or albumin* or protein* or glomerular filtration rate* or ?GFR).ti,ab. | 5179794      |
| 19           | exp kidney/ or exp proteinuria/                                                                                                    | 643196       |
| 20           | (kidney or renal or disease or insufficien* or failure* or nephro*).ti,ab.                                                         | 7596748      |
| 21           | or/18-20                                                                                                                           | 1160591<br>6 |
| 22           | (kidney or renal).mp. and (transplan* or graft*).ti.                                                                               | 156070       |
| 23           | 21 not 22                                                                                                                          | 1145933<br>1 |
| 24           | 17 and 23                                                                                                                          | 5916         |
| 25           | (conference abstract or conference paper or conference review).pt.                                                                 | 5452713      |
| 26           | 24 not 25                                                                                                                          | 4217         |
| 27           | editorial/ or letter/ or case reports/ or comment/ or note/                                                                        | 2784877      |
| 28           | 26 not 27                                                                                                                          | 4193         |

**Pubmed**

| Steps | Terms                                                                                                                                                                                               | Hits     |
|-------|-----------------------------------------------------------------------------------------------------------------------------------------------------------------------------------------------------|----------|
| 1     | "exercise"[mesh] OR "exercise test"[mesh]                                                                                                                                                           | 291459   |
| 2     | "Physical Education and Training"[mesh] OR "physical fitness"[mesh] OR "cardiorespiratory fitness"[mesh]                                                                                            | 47747    |
| 3     | (exercise*[tiab] OR sport*[tiab] OR walking*[tiab] OR "cycling"[tiab] OR "swimming"[tiab] OR "running"[tiab] OR "jogging"[tiab] OR "sedentary"[tiab] OR inactiv*[tiab])                             | 991749   |
| 4     | (physical*[tiab] AND (activ*[tiab] OR inactiv*[tiab] OR treat*[tiab] OR exercis*[tiab] OR exertion*[tiab]))                                                                                         | 459726   |
| 5     | #1 OR #2 OR #3 OR #4                                                                                                                                                                                | 1384590  |
| 6     | ("controlled clinical trial"[tiab])                                                                                                                                                                 | 18695    |
| 7     | "clinical trial"[pt]                                                                                                                                                                                | 961591   |
| 8     | ("randomized controlled trial"[ti])                                                                                                                                                                 | 58192    |
| 9     | ("randomized"[ti] OR "trial"[ti])                                                                                                                                                                   | 353735   |
| 10    | "cohort studies"[mesh]                                                                                                                                                                              | 2441995  |
| 11    | ("retrospective"[ti] OR "prospective"[ti] OR "longitudinal"[ti])                                                                                                                                    | 346215   |
| 12    | #6 OR #7 OR #8 OR #9 OR #10 OR #11                                                                                                                                                                  | 3362395  |
| 13    | #5 AND #12                                                                                                                                                                                          | 210509   |
| 14    | "animals"[mesh]                                                                                                                                                                                     | 26116055 |
| 15    | #13 NOT #14                                                                                                                                                                                         | 8628     |
| 16    | interven*[ti] OR change*[ti] OR traject*[ti] OR shift*[ti] OR switch*[ti] OR alternat*[ti] OR differen*[ti] OR variat*[ti] OR revamp*[ti]                                                           | 1765363  |
| 17    | #15 AND #16                                                                                                                                                                                         | 1223     |
| 18    | (uremi*[tiab] OR uraemi*[tiab] OR albuminuria*[tiab] OR proteinuria*[tiab] OR urin*[tiab] OR albumin*[tiab] OR protein*[tiab] OR glomerular filtration rate*[tiab] OR "eGFR"[tiab] OR "mGFR"[tiab]) | 4147077  |
| 19    | "kidney"[mesh] OR "proteinuria"[mesh]                                                                                                                                                               | 400520   |
| 20    | ("kidney"[tiab] OR "renal"[tiab] OR "disease"[tiab] OR insufficien*[tiab] OR failure*[tiab] OR nephro*[tiab])                                                                                       | 5250858  |
| 21    | #18 OR #19 OR #20                                                                                                                                                                                   | 8585949  |
| 22    | ((("kidney"[tiab] OR "kidney"[mh]) OR ("renal"[tiab])) AND (transplan*[ti] OR graft*[ti]))                                                                                                          | 87814    |
| 23    | #21 NOT #22                                                                                                                                                                                         | 8498135  |
| 24    | #17 AND #23                                                                                                                                                                                         | 295      |
| 25    | "editorial"[pt] OR "letter"[pt] OR "comment"[pt]                                                                                                                                                    | 2129064  |
| 26    | #24 NOT #25                                                                                                                                                                                         | 294      |

## Web of Science

| Steps | Terms                                                                                                                                                             | Hits     |
|-------|-------------------------------------------------------------------------------------------------------------------------------------------------------------------|----------|
| 1     | TS=(physical activity OR exercise test OR physical fitness OR exercise OR sport OR sedentary OR inactive OR exertion)                                             | 2869900  |
| 2     | TS=(controlled clinical trial OR clinical trail OR randomized controlled trial OR cohort study OR retrospective study OR prospective study OR longitudinal study) | 4391262  |
| 3     | #1 AND #2                                                                                                                                                         | 230548   |
| 4     | TS=(animal OR nonhuman OR non-human)                                                                                                                              | 30545714 |
| 5     | #3 NOT #4                                                                                                                                                         | 118699   |
| 6     | TS=(interven* or change* or traject* or shift* or switch* or alternat* or differen* or variat* or revamp*)                                                        | 46832576 |
| 7     | #5 AND #6                                                                                                                                                         | 82111    |
| 8     | TS=(uremi* or uraemi* or albumin* or proteinuria* or glomerular filtration rate* or eGFR or mGFR or kidney* or renal failure* or nephro*)                         | 2677866  |
| 9     | TS=(kidney or renal)                                                                                                                                              | 2378506  |
| 10    | TS=(transplan* or graft*)                                                                                                                                         | 2270415  |
| 11    | #9 AND #10                                                                                                                                                        | 323241   |
| 12    | #8 NOT #11                                                                                                                                                        | 2405699  |
| 13    | #7 AND #12                                                                                                                                                        | 1320     |
| 14    | TS=(editorial or letter or case report* or comment)                                                                                                               | 3433986  |
| 15    | #13 NOT #14                                                                                                                                                       | 1267     |

Table S2 General characteristics of the included studies

| Author, year                                   | Study type | Country                  | Exercise Group Characteristics                                 | Baseline Size of Exercise Group                                                                | Attrition                                                                         | Study Population Age                                                                                                      | Type of Exercise                                           | Exercise Frequency                                                                                                                                                         | Exercise Length | Exercise Intensity                                                                                                                                                                           | Kidney-relevant outcome | Findings                                                                                                                                                                                                 |
|------------------------------------------------|------------|--------------------------|----------------------------------------------------------------|------------------------------------------------------------------------------------------------|-----------------------------------------------------------------------------------|---------------------------------------------------------------------------------------------------------------------------|------------------------------------------------------------|----------------------------------------------------------------------------------------------------------------------------------------------------------------------------|-----------------|----------------------------------------------------------------------------------------------------------------------------------------------------------------------------------------------|-------------------------|----------------------------------------------------------------------------------------------------------------------------------------------------------------------------------------------------------|
| de Oliveira <i>et al.</i> <sup>40</sup> , 2012 | RCT        | Brazil                   | Patients with type 2 diabetes mellitus of a ambulatory clinic. | Aerobic training: 12 people<br>Strength training: 12 people<br>Combination training: 12 people | Aerobic training: 9.1%<br>Strength training: 16.7%<br>Combination training: 16.7% | Mean (SD), years:<br>Aerobic training: 52.09 (8.71)<br>Strength training: 54.10 (8.94)<br>Combined training: 57.90 (9.82) | Aerobic training, strength training, and combined training | One hour/session, three sessions/week                                                                                                                                      | 12 weeks        | Not used VO2peak in aerobic and combined training due to unable to get accurate value, used lactate threshold.<br><br>Strength training: 50% of 1 RM for the Week 1&2, 8-12 RM for Week 3&4. | Urea                    | Pre/Post Exercise, mean (SD), mg/dL<br>Aerobic training: Urea 29.27 (5.93) / 28.18 (6.36)<br>Strength training: Urea 31.00 (10.56) / 29.90 (8.82)<br>Combined training: Urea 34.40 (9.91) / 35.20 (9.40) |
| Geyssant <i>et al.</i> <sup>44</sup> , 1981    | CT         | France                   | Healthy male.                                                  | 4 people                                                                                       | 0%                                                                                | Mean (SD), years: 36 (6.4)                                                                                                | Aerobic                                                    | One hour/session, four sessions/week                                                                                                                                       | 5 months        | 87% VO2max                                                                                                                                                                                   | PRA                     | Pre/Post Exercise, mean (SD), ng/l/mn<br>PRA, 106.08 (48.48)/ 62.5 (49.9)                                                                                                                                |
| Hagberg <i>et al.</i> <sup>30</sup> , 1989     | RCT        | United States of America | Patients with essential hypertension.                          | Low-intensity: 14 people<br>Moderate-intensity : 10 people                                     | Low-intensity: 21.4%<br>Moderate-intensity : 0%                                   | Mean (SD), years: all groups 64 (3)                                                                                       | Aerobic                                                    | Low-intensive: one hour/session, max three sessions/week<br><br>Moderate-intensive: 45 to 60 minutes/session, 3 sessions/week for at least the last 4-5 months of training | 9 months        | Low-intensity: 50% VO2max<br>Moderate-intensity : 70-85% VO2max                                                                                                                              | PRA                     | Pre/Post Exercise, mean (SD), ng/ml/hr<br>Low-intensity: PRA 1.6 (1.1) / 0.7 (0.4)<br>Moderate-intensity : PRA 2.0 (1.3) / 1.1 (0.9)                                                                     |
| Kinoshita <i>et al.</i> <sup>36</sup> , 1991   | CT         | Japan                    | Patients with essential hypertension.                          | 12 people                                                                                      | 0%                                                                                | Mean (SD), years: 51.7 (2.3)                                                                                              | Aerobic                                                    | One hour/session, three sessions/week                                                                                                                                      | 10 weeks        | 50% VO2max                                                                                                                                                                                   | PRA, eGFR               | Pre/Post Exercise, mean (SE), ng/ml/h<br>PRA 1.3 (0.2) / 1.26 (0.4)<br><br>Pre/Post Exercise, mean (SE), ml/min eGFR 99 (4.7) / 105 (5.2)                                                                |

|                                                     |     |           |                                                                   |                                                     |                                          |                                                |         |                                                                                                                                                                                       |                                              |                                                                                            |               |                                                                                                                                      |
|-----------------------------------------------------|-----|-----------|-------------------------------------------------------------------|-----------------------------------------------------|------------------------------------------|------------------------------------------------|---------|---------------------------------------------------------------------------------------------------------------------------------------------------------------------------------------|----------------------------------------------|--------------------------------------------------------------------------------------------|---------------|--------------------------------------------------------------------------------------------------------------------------------------|
| Kiyonaga<br><i>et al.</i> <sup>31</sup> ,<br>1985   | CT  | Japan     | Patients with essential hypertension.                             | 12 people                                           | At 10 weeks: 0%<br>At 20 weeks: 25%      | Mean (Range),<br>years: 46 (34 to 56)          | Aerobic | One hour/session, three sessions/week                                                                                                                                                 | 20 weeks                                     | Used lactate threshold, but claimed to have a 50% VO2max although data were not published. | PRA<br>Ang II | Pre/Post Exercise, mean (SE), ng/ml/hr<br>PRA 11 (4) / 13 (3)                                                                        |
|                                                     |     |           |                                                                   |                                                     |                                          |                                                |         |                                                                                                                                                                                       |                                              |                                                                                            |               | Pre/Post Exercise, mean (SE), pg/ml<br>Ang II 58 (8) / 91 (12)                                                                       |
|                                                     |     |           |                                                                   |                                                     |                                          |                                                |         |                                                                                                                                                                                       |                                              |                                                                                            |               | Pre/Post Exercise, mean (SE), ng/ml/h<br>PRA 0.77 (0.19) / 0.4 (0.1)                                                                 |
|                                                     |     |           |                                                                   |                                                     |                                          |                                                |         |                                                                                                                                                                                       |                                              |                                                                                            |               | Pre/Post Exercise, median (IQR), ng/ml/h<br>PRA 0.8 (0.45 - 2.0) / 1.45 (0.8 - 2.15)                                                 |
|                                                     |     |           |                                                                   |                                                     |                                          |                                                |         |                                                                                                                                                                                       |                                              |                                                                                            |               | Pre/Post Exercise, mean (SE), ng/ml/h<br>Low-workload: PRA 0.82 (0.22) / 0.62 (0.27)<br>High-workload: PRA 1.26 (0.15) / 1.47 (0.16) |
| Koga<br><i>et al.</i> <sup>37</sup> ,<br>1992       | CT  | Japan     | Female atients with essential hypertension                        | 10 people                                           | 0%                                       | Mean (SEM),<br>years: 49 (2)                   | Aerobic | One hour/session, three sessions/week                                                                                                                                                 | 10 weeks                                     | 50% VO2max                                                                                 | PRA           | Pre/Post Exercise, mean (SE), ng/ml/h<br>PRA 0.77 (0.19) / 0.4 (0.1)                                                                 |
|                                                     |     |           |                                                                   |                                                     |                                          |                                                |         |                                                                                                                                                                                       |                                              |                                                                                            |               | Pre/Post Exercise, median (IQR), ng/ml/h<br>PRA 0.8 (0.45 - 2.0) / 1.45 (0.8 - 2.15)                                                 |
|                                                     |     |           |                                                                   |                                                     |                                          |                                                |         |                                                                                                                                                                                       |                                              |                                                                                            |               | Pre/Post Exercise, mean (SE), ng/ml/h<br>Low-workload: PRA 0.82 (0.22) / 0.62 (0.27)<br>High-workload: PRA 1.26 (0.15) / 1.47 (0.16) |
|                                                     |     |           |                                                                   |                                                     |                                          |                                                |         |                                                                                                                                                                                       |                                              |                                                                                            |               | Pre/Post Exercise, mean (SE), ng/ml/h<br>Low-workload: PRA 0.82 (0.22) / 0.62 (0.27)<br>High-workload: PRA 1.26 (0.15) / 1.47 (0.16) |
|                                                     |     |           |                                                                   |                                                     |                                          |                                                |         |                                                                                                                                                                                       |                                              |                                                                                            |               | Pre/Post Exercise, mean (SE), ng/ml/h<br>Low-workload: PRA 0.82 (0.22) / 0.62 (0.27)<br>High-workload: PRA 1.26 (0.15) / 1.47 (0.16) |
| Martinelli<br><i>et al.</i> <sup>34</sup> ,<br>2010 | CT  | Brazil    | Overweight patients with hypertension.                            | 20 people                                           | 0%                                       | Mean (SD), years: 57 (7.1)                     | Aerobic | 40 min/session, three sessions/week                                                                                                                                                   | 16 weeks                                     | 60-80% HRmax                                                                               | PRA           | Pre/Post Exercise, median (IQR), ng/ml/h<br>PRA 0.8 (0.45 - 2.0) / 1.45 (0.8 - 2.15)                                                 |
|                                                     |     |           |                                                                   |                                                     |                                          |                                                |         |                                                                                                                                                                                       |                                              |                                                                                            |               | Pre/Post Exercise, mean (SE), ng/ml/h<br>Low-workload: PRA 0.82 (0.22) / 0.62 (0.27)<br>High-workload: PRA 1.26 (0.15) / 1.47 (0.16) |
|                                                     |     |           |                                                                   |                                                     |                                          |                                                |         |                                                                                                                                                                                       |                                              |                                                                                            |               | Pre/Post Exercise, mean (SE), ng/ml/h<br>Low-workload: PRA 0.82 (0.22) / 0.62 (0.27)<br>High-workload: PRA 1.26 (0.15) / 1.47 (0.16) |
|                                                     |     |           |                                                                   |                                                     |                                          |                                                |         |                                                                                                                                                                                       |                                              |                                                                                            |               | Pre/Post Exercise, mean (SE), ng/ml/h<br>Low-workload: PRA 0.82 (0.22) / 0.62 (0.27)<br>High-workload: PRA 1.26 (0.15) / 1.47 (0.16) |
|                                                     |     |           |                                                                   |                                                     |                                          |                                                |         |                                                                                                                                                                                       |                                              |                                                                                            |               | Pre/Post Exercise, mean (SE), ng/ml/h<br>Low-workload: PRA 0.82 (0.22) / 0.62 (0.27)<br>High-workload: PRA 1.26 (0.15) / 1.47 (0.16) |
| Matsusaki<br><i>et al.</i> <sup>38</sup> ,<br>1992  | CT  | Japan     | Patients with hypertension.                                       | Low-workload: 16 people<br>High-workload: 14 people | Low-workload: 0%<br>High-workload: 28.6% | Mean (SEM),<br>years: all groups<br>47.2 (1.5) | Aerobic | Low-workload: one hour/session, three sessions/week<br><br>High-workload: 30-40 min/session, three sessions per week<br><br>Three levels of activity for one month each successively. | 10 weeks                                     | Low-workload: 50% VO2max<br>High-workload: 75% VO2max                                      | PRA           | Pre/Post Exercise, mean (SE), ng/ml/h<br>Low-workload: PRA 0.82 (0.22) / 0.62 (0.27)<br>High-workload: PRA 1.26 (0.15) / 1.47 (0.16) |
|                                                     |     |           |                                                                   |                                                     |                                          |                                                |         |                                                                                                                                                                                       |                                              |                                                                                            |               | Pre/Post Exercise, mean (SE), ng/ml/h<br>Low-workload: PRA 0.82 (0.22) / 0.62 (0.27)<br>High-workload: PRA 1.26 (0.15) / 1.47 (0.16) |
|                                                     |     |           |                                                                   |                                                     |                                          |                                                |         |                                                                                                                                                                                       |                                              |                                                                                            |               | Pre/Post Exercise, mean (SE), ng/ml/h<br>Low-workload: PRA 0.82 (0.22) / 0.62 (0.27)<br>High-workload: PRA 1.26 (0.15) / 1.47 (0.16) |
|                                                     |     |           |                                                                   |                                                     |                                          |                                                |         |                                                                                                                                                                                       |                                              |                                                                                            |               | Pre/Post Exercise, mean (SE), ng/ml/h<br>Low-workload: PRA 0.82 (0.22) / 0.62 (0.27)<br>High-workload: PRA 1.26 (0.15) / 1.47 (0.16) |
|                                                     |     |           |                                                                   |                                                     |                                          |                                                |         |                                                                                                                                                                                       |                                              |                                                                                            |               | Pre/Post Exercise, mean (SE), ng/ml/h<br>Low-workload: PRA 0.82 (0.22) / 0.62 (0.27)<br>High-workload: PRA 1.26 (0.15) / 1.47 (0.16) |
| Nelson<br><i>et al.</i> <sup>39</sup> ,<br>1986     | CT  | Australia | Patients with essential hypertension of a risk-evaluation clinic. | 17 people                                           | 23.5%                                    | Mean (Range) ,<br>years: 44 (25 to 62)         | Aerobic | First month: normal sedentary, no training<br>Second month: 45 min/session, three sessions/week<br>Third month: 45 min/session, seven sessions/week                                   | 2 months (exclude the first sedentary month) | 60-70% VO2max                                                                              | PRA           | Pre/Post Exercise, mean (SEM), ng/ml/h<br>PRA 1.45 (0.51) / 1.46 (0.30)                                                              |
|                                                     |     |           |                                                                   |                                                     |                                          |                                                |         |                                                                                                                                                                                       |                                              |                                                                                            |               | Pre/Post Exercise, mean (SEM), ng/ml/h<br>PRA 1.45 (0.51) / 1.46 (0.30)                                                              |
|                                                     |     |           |                                                                   |                                                     |                                          |                                                |         |                                                                                                                                                                                       |                                              |                                                                                            |               | Pre/Post Exercise, mean (SEM), ng/ml/h<br>PRA 1.45 (0.51) / 1.46 (0.30)                                                              |
|                                                     |     |           |                                                                   |                                                     |                                          |                                                |         |                                                                                                                                                                                       |                                              |                                                                                            |               | Pre/Post Exercise, mean (SEM), ng/ml/h<br>PRA 1.45 (0.51) / 1.46 (0.30)                                                              |
|                                                     |     |           |                                                                   |                                                     |                                          |                                                |         |                                                                                                                                                                                       |                                              |                                                                                            |               | Pre/Post Exercise, mean (SEM), ng/ml/h<br>PRA 1.45 (0.51) / 1.46 (0.30)                                                              |
| Passino<br><i>et al.</i> <sup>45</sup> ,<br>2006    | RCT | Italy     | Patients with heart failure.                                      | 47 people                                           | 6.4%                                     | Mean (SD), years: 60 (2)                       | Aerobic | Minimum 30 min/day, three days/week                                                                                                                                                   | 9 months                                     | Heart rate at 65% VO2max                                                                   | PRA           | Pre/Post Exercise, mean (SD), ng/ml/h<br>PRA 3.04 (0.66) /                                                                           |
|                                                     |     |           |                                                                   |                                                     |                                          |                                                |         |                                                                                                                                                                                       |                                              |                                                                                            |               | Pre/Post Exercise, mean (SD), ng/ml/h<br>PRA 3.04 (0.66) /                                                                           |
|                                                     |     |           |                                                                   |                                                     |                                          |                                                |         |                                                                                                                                                                                       |                                              |                                                                                            |               | Pre/Post Exercise, mean (SD), ng/ml/h<br>PRA 3.04 (0.66) /                                                                           |
|                                                     |     |           |                                                                   |                                                     |                                          |                                                |         |                                                                                                                                                                                       |                                              |                                                                                            |               | Pre/Post Exercise, mean (SD), ng/ml/h<br>PRA 3.04 (0.66) /                                                                           |
|                                                     |     |           |                                                                   |                                                     |                                          |                                                |         |                                                                                                                                                                                       |                                              |                                                                                            |               | Pre/Post Exercise, mean (SD), ng/ml/h<br>PRA 3.04 (0.66) /                                                                           |

|                                              |     |                          |                                                                |                                                                          |                                                                 |                                                                           |                                            |                                                      |          |                      |                     |                                                                      |  |  |                                                                                                          |
|----------------------------------------------|-----|--------------------------|----------------------------------------------------------------|--------------------------------------------------------------------------|-----------------------------------------------------------------|---------------------------------------------------------------------------|--------------------------------------------|------------------------------------------------------|----------|----------------------|---------------------|----------------------------------------------------------------------|--|--|----------------------------------------------------------------------------------------------------------|
|                                              |     |                          |                                                                |                                                                          |                                                                 |                                                                           |                                            |                                                      |          |                      |                     |                                                                      |  |  | 2.96 (0.62)                                                                                              |
| Sikiru and Okoye <sup>33</sup> , 2014        | RCT | Nigeria                  | Patients with essential hypertension of a hypertensive clinic. | 162 people                                                               | 30.9%                                                           | Mean (SD), years: 58.63 (7.22)                                            | Aerobic                                    | 45 min/session, three sessions/week for Week 1 and 2 | 8 weeks  | 60-79% of HR reserve | SCr                 | Pre/Post Exercise, mean (SD), mg/dL<br>SCr 0.81 (0.17) / 0.85 (0.39) |  |  |                                                                                                          |
| Sullivan <i>et al.</i> <sup>35</sup> , 1992  | CT  | United States of America | Male patients with uncomplicated essential hypertension.       | 15 people                                                                | 0%                                                              | Mean (SD), years: 42.3 (1.0)                                              | Strenuous Aerobic                          | 18 min/session, three sessions/week                  | 6 weeks  | 90% HRmax            | PRA                 | Pre/Post Exercise, mean (SE), ng/ml/h<br>PRA 1.9 (0.3) / 1.94 (0.4)  |  |  |                                                                                                          |
|                                              |     |                          |                                                                |                                                                          |                                                                 |                                                                           |                                            |                                                      |          |                      |                     |                                                                      |  |  | Pre/Post Exercise, mean (SD)                                                                             |
|                                              |     |                          |                                                                |                                                                          |                                                                 |                                                                           |                                            |                                                      |          |                      |                     |                                                                      |  |  | Endurance group                                                                                          |
|                                              |     |                          |                                                                |                                                                          |                                                                 |                                                                           |                                            |                                                      |          |                      |                     |                                                                      |  |  | SCr, mg/dL 0.76 (0.11) / 0.84 (0.11)                                                                     |
|                                              |     |                          |                                                                |                                                                          |                                                                 |                                                                           |                                            |                                                      |          |                      |                     |                                                                      |  |  | eGFR-MDRD, 87.81 (18.43) / 77.90 (12.65)                                                                 |
|                                              |     |                          |                                                                |                                                                          |                                                                 |                                                                           |                                            |                                                      |          |                      |                     |                                                                      |  |  | eGFR-CG, 129.47 (33.24) / 114.02 (24.98)                                                                 |
|                                              |     |                          |                                                                |                                                                          |                                                                 |                                                                           |                                            |                                                      |          |                      |                     |                                                                      |  |  | Endurance group: 50-80% HRmax                                                                            |
|                                              |     |                          |                                                                |                                                                          |                                                                 |                                                                           |                                            |                                                      |          |                      |                     |                                                                      |  |  | Endurance+strengt h group: 50-80% HRmax for endurance training, unclear intensity for strength exercise. |
| Szulinska <i>et al.</i> <sup>42</sup> , 2016 | RCT | Poland                   | Women with obesity.                                            | Endurance training: 22 people<br>Endurance+strengt h training: 22 people | Endurance training: 4.5%<br>Endurance+strengt h training: 22.7% | Mean (SD), years: Endurance 51.3 (8.3)<br>Endurance+strengt h 48.2 (11.2) | Endurance and Endurance+strengt h training | One hour/session, three sessions/week                | 3 months |                      | SCr<br>eGFR<br>UACR | cr 1.19 (2.32) / 1.28 (2.42)                                         |  |  |                                                                                                          |
|                                              |     |                          |                                                                |                                                                          |                                                                 |                                                                           |                                            |                                                      |          |                      |                     |                                                                      |  |  | Endurance+strengt h group                                                                                |
|                                              |     |                          |                                                                |                                                                          |                                                                 |                                                                           |                                            |                                                      |          |                      |                     |                                                                      |  |  | SCr, mg/dL 0.73 (0.10) / 0.81 (0.10)                                                                     |
|                                              |     |                          |                                                                |                                                                          |                                                                 |                                                                           |                                            |                                                      |          |                      |                     |                                                                      |  |  | eGFR-MDRD, 93.58 (17.87) / 82.54 (12.01)                                                                 |
|                                              |     |                          |                                                                |                                                                          |                                                                 |                                                                           |                                            |                                                      |          |                      |                     |                                                                      |  |  | eGFR-CG, 143.91 (36.69) / 124.65 (26.71)                                                                 |
|                                              |     |                          |                                                                |                                                                          |                                                                 |                                                                           |                                            |                                                      |          |                      |                     |                                                                      |  |  | UACR, mg/mmol cr 0.76 (0.28) / 0.65 (0.28)                                                               |



|                                                   |     |              |                                       |                                                                 |                                                                   |    |                                     |            |                                       |          |                                                   |          |                                                                                                                                                     |
|---------------------------------------------------|-----|--------------|---------------------------------------|-----------------------------------------------------------------|-------------------------------------------------------------------|----|-------------------------------------|------------|---------------------------------------|----------|---------------------------------------------------|----------|-----------------------------------------------------------------------------------------------------------------------------------------------------|
| Trabelsi<br><i>et al.</i> <sup>43</sup> ,<br>2012 | CT  | Turnisa      | Male recreational bodybuilders.       | non-faster: people                                              | 7                                                                 | 0% | Mean (SD), years: non-faster 26 (3) | Resistance | Four sessions/week                    | 1 month  | Four sets with a load of 10 RM for each exercise. | Urea SCr | Pre/Post Exercise, mean (SD), mmol/L<br>Urea 4.51 (0.32) / 4.5 (0.26)                                                                               |
| Urata<br><i>et al.</i> <sup>32</sup> ,<br>1987    | RCT | Japan        | Patients with essential hypertension. | 10 people                                                       |                                                                   | 0% | Mean (SE), years: 51.4 (2.8)        | Aerobic    | One hour/session, three sessions/week | 10 weeks | 40-60% VO2max                                     | PRA      | Pre/Post Exercise, mean (SD), μmol/L<br>SCr 91.14 (4.45) / 94.29 (4.31)<br>Pre/Post Exercise, mean (SE), ng/mL/min<br>PRA 1.24 (0.24) / 1.50 (0.39) |
| Zaman<br><i>et al.</i> <sup>41</sup> ,<br>2021    | RCT | Saudi Arabia | Obese and non-obese male people.      | Obese resistance training: 25 Non-obese resistance training: 25 | Obese resistance training: 20% Non-obese resistance training: 20% |    | Range, years: 35 to 60              | Resistance | 50 min/session, three days/week       | 12 weeks | 50-70% of 1 RM                                    | Urea     | Pre/Post Exercise, mean (SD), mg/dl<br>Obese people Urea 33.33 (3.57) / 32.27 (2.54),                                                               |

Ang II,angiotensin II; CT, clinical trial; eGFR, estimated glomerular filtration rate; HR, heart rate; PRA, plasma renin activity; RCT, randomized clinical trial; RM, repetition maximum; SCr, serum creatinine; SD, standard deviation;SE, standard error; UARC, urine albumin-to-creatinine ratio; VO2, maximum rate of oxygen.

Note: Conversion factors for units: serum creatinine in mg/dL to μmol/L, ×88.4; urea nitrogen in mg/dL to mmol/L, ×0.357.

Table S3 Cochrane Risk of Bias Assessment Form

| Author, Year                                   | Random<br>sequence<br>generation<br>(selection<br>bias) | Allocation<br>concealment<br>(selection bias) | Blinding of<br>participants and<br>personnel<br>(performance<br>bias) | Blinding of<br>outcome<br>assessment<br>(detection bias):<br>Self-reported<br>outcomes | Blinding of<br>outcome<br>assessment<br>(detection bias):<br>Objective<br>measures | Incomplete<br>outcome data<br>(attrition bias):<br>All outcomes | Selective<br>reporting<br>(reporting<br>bias) | Other<br>bias | Overall |
|------------------------------------------------|---------------------------------------------------------|-----------------------------------------------|-----------------------------------------------------------------------|----------------------------------------------------------------------------------------|------------------------------------------------------------------------------------|-----------------------------------------------------------------|-----------------------------------------------|---------------|---------|
| de Oliveira <i>et al.</i> <sup>40</sup> , 2012 | Unclear                                                 | Low                                           | High                                                                  | Not applicable                                                                         | Low                                                                                | Low                                                             | Low                                           | Low           | Low     |
| Geyssant <i>et al.</i> <sup>44</sup> , 1981    | Not applicable                                          | Not applicable                                | High                                                                  | Not applicable                                                                         | Low                                                                                | Low                                                             | Low                                           | Low           | Low     |
| Hagberg <i>et al.</i> <sup>30</sup> , 1989     | Unclear                                                 | Low                                           | High                                                                  | Not applicable                                                                         | Low                                                                                | High                                                            | Low                                           | Low           | High    |
| Kinoshita <i>et al.</i> <sup>36</sup> , 1991   | Not applicable                                          | Not applicable                                | High                                                                  | Not applicable                                                                         | Low                                                                                | Low                                                             | Low                                           | Low           | Low     |
| Kiyonaga <i>et al.</i> <sup>31</sup> , 1985    | Not applicable                                          | Not applicable                                | High                                                                  | Not applicable                                                                         | Low                                                                                | High                                                            | Low                                           | Low           | High    |
| Koga <i>et al.</i> <sup>37</sup> , 1992        | Not applicable                                          | High                                          | High                                                                  | Not applicable                                                                         | Low                                                                                | Low                                                             | Low                                           | Low           | High    |
| Martinelli <i>et al.</i> <sup>34</sup> , 2010  | Not applicable                                          | Not applicable                                | High                                                                  | Not applicable                                                                         | Low                                                                                | Low                                                             | Low                                           | Low           | Low     |
| Matsusaki <i>et al.</i> <sup>38</sup> , 1992   | Unclear                                                 | Low                                           | High                                                                  | Not applicable                                                                         | Low                                                                                | High                                                            | Low                                           | Low           | High    |
| Nelson <i>et al.</i> <sup>39</sup> , 1986      | Not applicable                                          | Not applicable                                | High                                                                  | Not applicable                                                                         | Low                                                                                | High                                                            | Low                                           | Low           | High    |
| Passino <i>et al.</i> <sup>45</sup> , 2006     | Unclear                                                 | Low                                           | High                                                                  | Not applicable                                                                         | Low                                                                                | Low                                                             | Low                                           | Low           | Low     |
| Sikiru and Okoye <sup>33</sup> , 2014          | High                                                    | High                                          | High                                                                  | Not applicable                                                                         | Low                                                                                | High                                                            | Low                                           | Low           | High    |

|                                                |                |                |      |                |     |      |      |     |      |
|------------------------------------------------|----------------|----------------|------|----------------|-----|------|------|-----|------|
| Sullivan <i>et al.</i> <sup>35</sup> ,<br>1992 | Not applicable | Not applicable | High | Not applicable | Low | Low  | Low  | Low | Low  |
| Szulinska <i>et al.</i> <sup>42</sup> , 2016   | Low            | Low            | High | Not applicable | Low | High | Low  | Low | High |
| Trabelsi <i>et al.</i> <sup>43</sup> ,<br>2012 | Unclear        | High           | High | Not applicable | Low | Low  | Low  | Low | High |
| Urata <i>et al.</i> <sup>32</sup> ,<br>1987    | Unclear        | Low            | High | Not applicable | Low | Low  | Low  | Low | Low  |
| Zaman <i>et al.</i> <sup>41</sup> ,<br>2021    | Low            | Unclear        | High | Not applicable | Low | High | High | Low | High |

Figure S1 PRISMA workflow

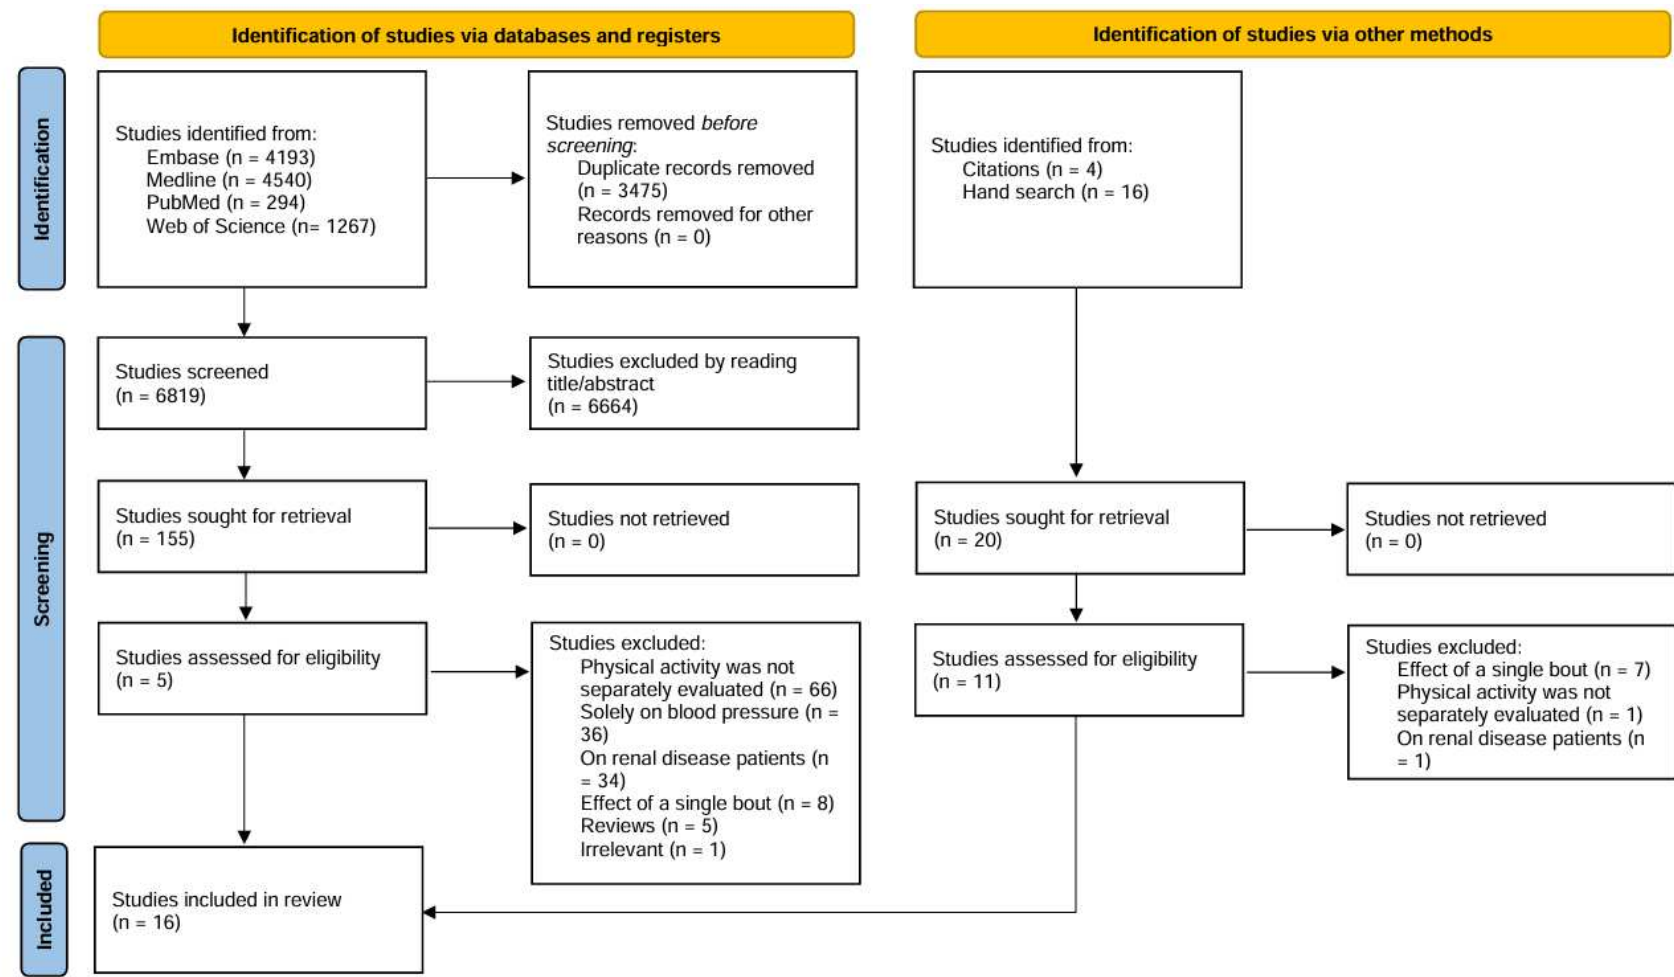

Figure S2a Obesity stratified meta-analysis on the association of changes in physical activity with serum creatinine.

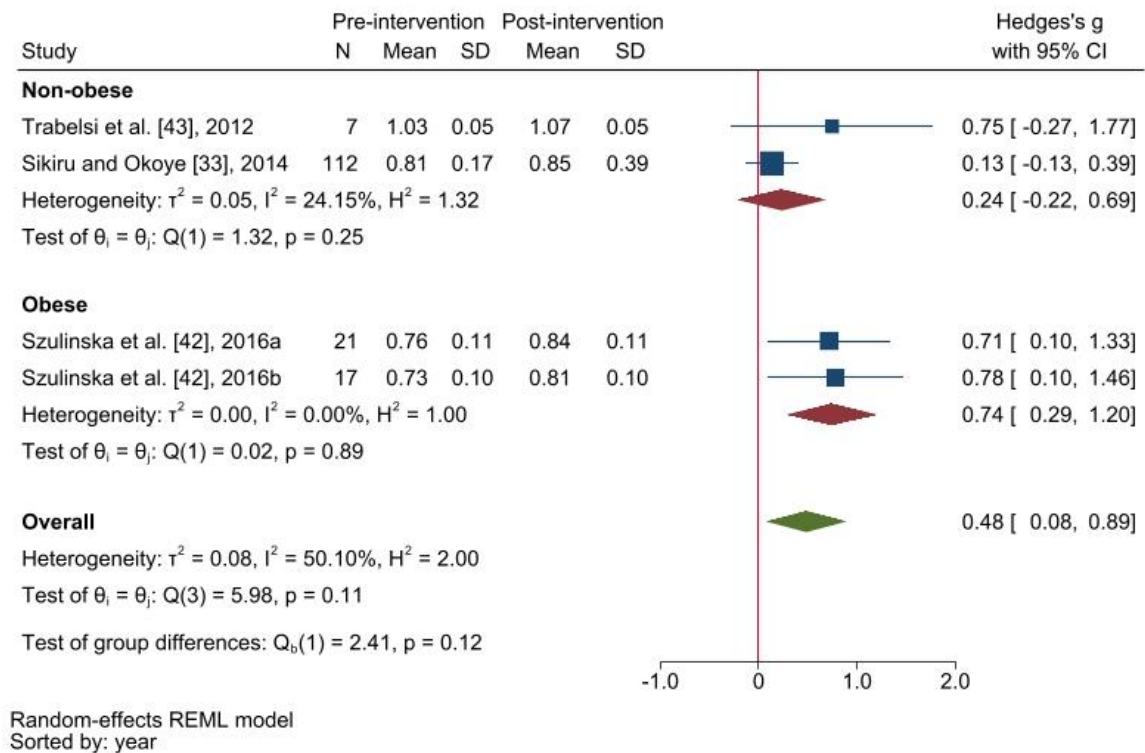

Szulinska *et al.* [42], 2016a: Patients received endurance training.  
Szulinska *et al.* [42], 2016b: Patients received both endurance and strength training.

**Figure S2b Exercise duration stratified meta-analysis on the association of changes in physical activity with serum creatinine.**

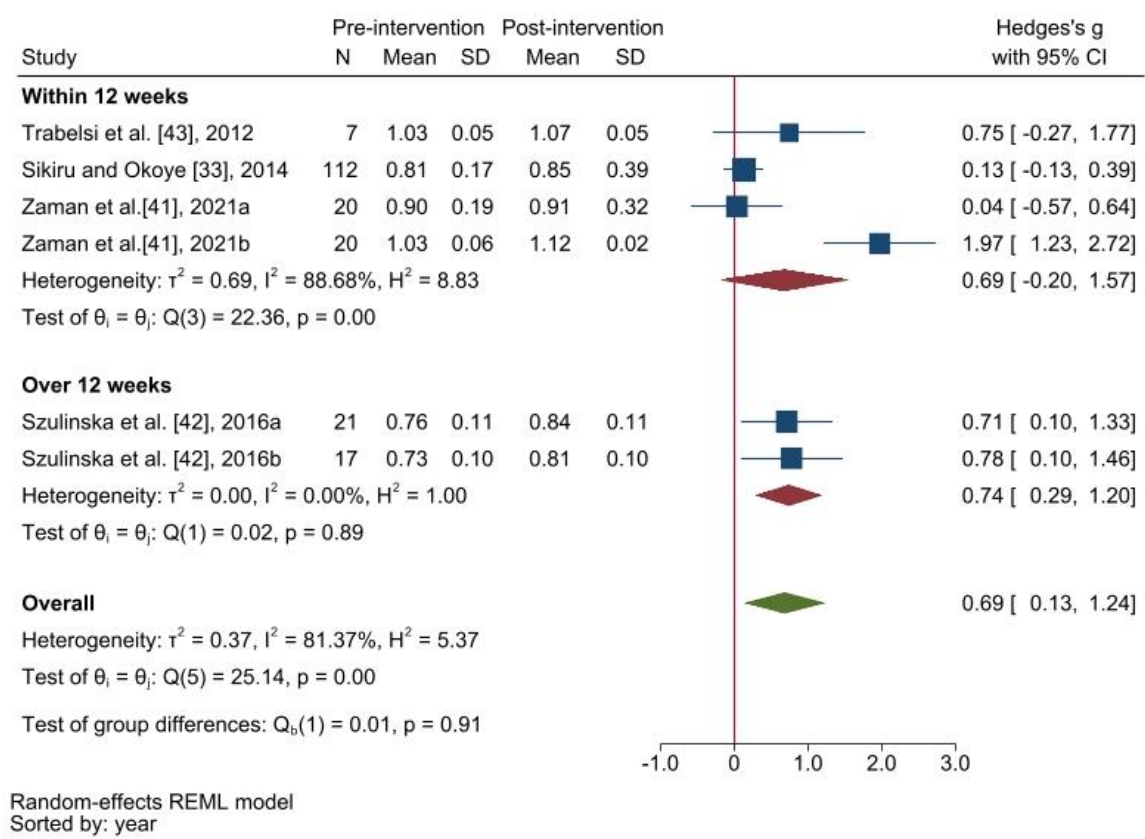

Szulinska *et al.* [42], 2016a: Patients received endurance training.  
Szulinska *et al.* [42], 2016b: Patients received both endurance and strength training.  
Zaman *et al.* [41], 2021a: Patients with obesity  
Zaman *et al.*[41], 2021b: Patients without obesity

Figure S2c. Funnel plot of studies on the association of changes in physical activity with serum creatinine

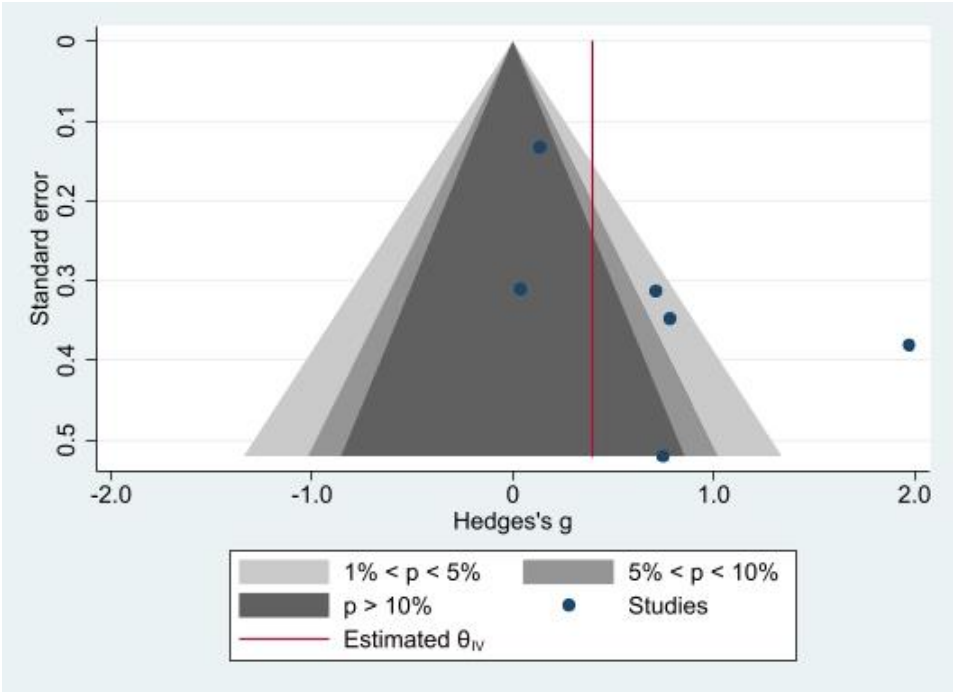

Figure S2d Leave-one-out figure of studies on the association of changes in physical activity with serum creatinine

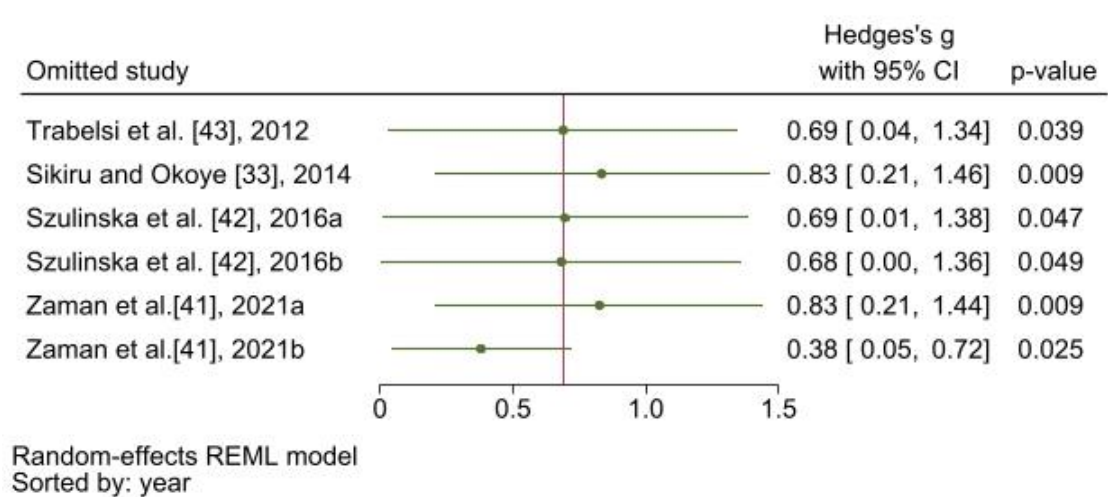

Szulinska *et al.* [42], 2016a: Patients received endurance training.  
Szulinska *et al.* [42], 2016b: Patients received both endurance and strength training.  
Zaman *et al.* [41], 2021a: Patients with obesity  
Zaman *et al.*[41], 2021b: Patients without obesity

**Figure S2e Cumulative meta-analysis of the association of changes in physical activity with serum creatinine**

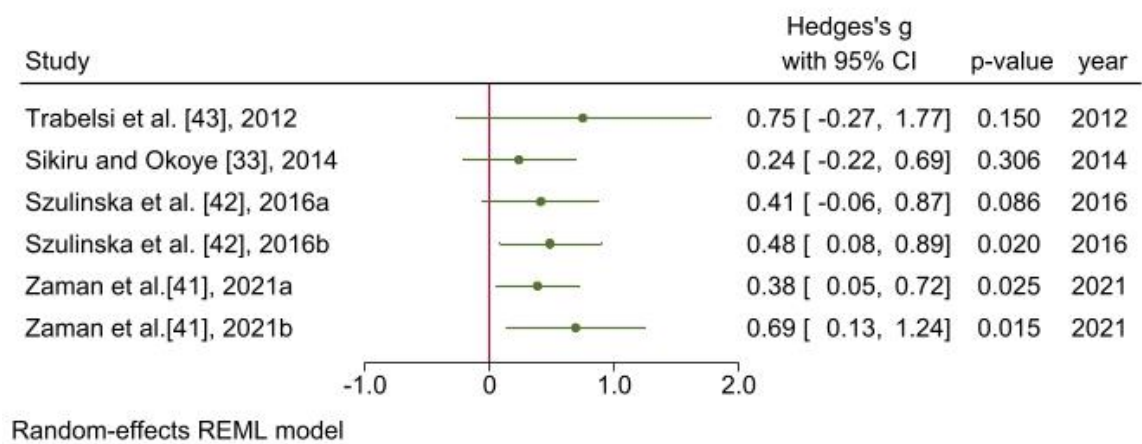

Szulinska *et al.* [42], 2016a: Patients received endurance training.  
Szulinska *et al.* [42], 2016b: Patients received both endurance and strength training.  
Zaman *et al.* [41], 2021a: Patients with obesity  
Zaman *et al.*[41], 2021b: Patients without obesity



Figure S3a Obesity stratified meta-analysis on the association of changes in physical activity with plasma renin activity

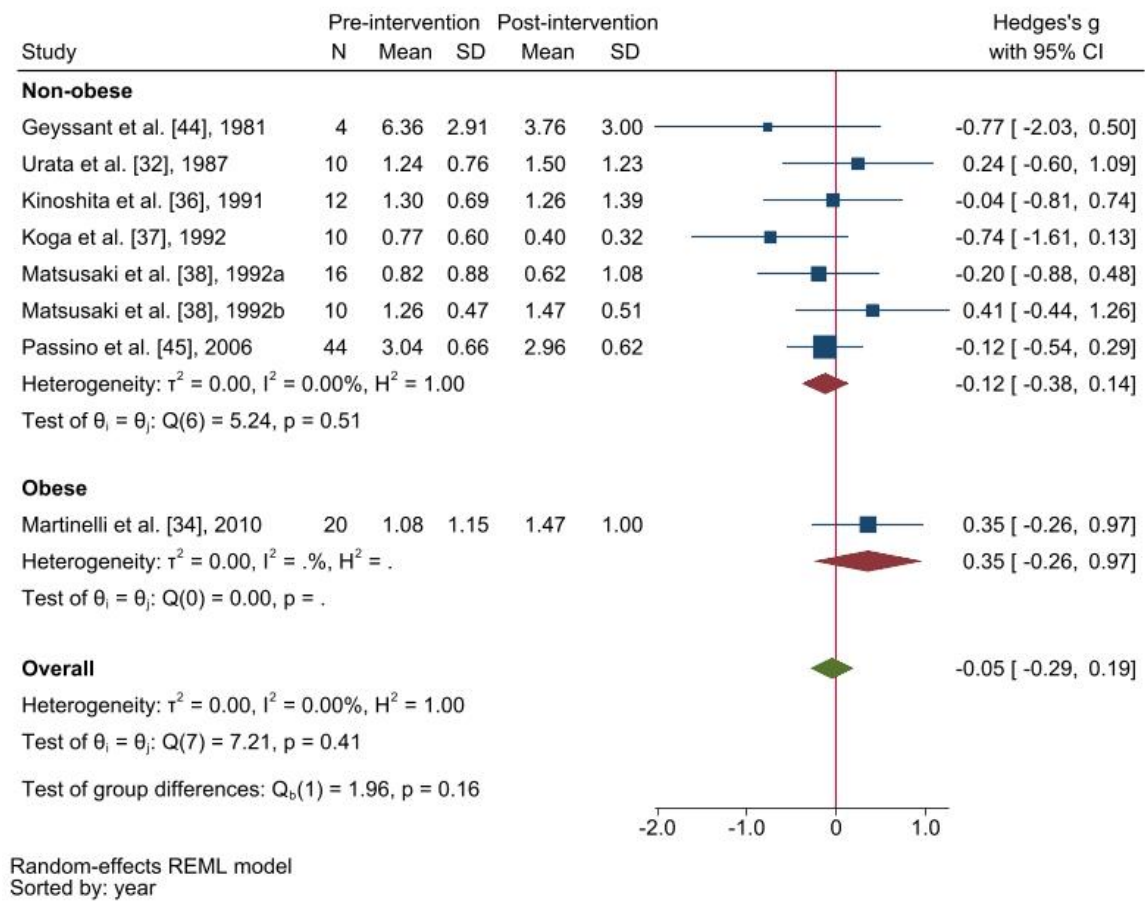

Matsusaki *et al.*[38], 1992a: Patients performed low-workload physical activity.  
Matsusaki *et al.*[38], 1992b: Patients performed high-workload physical activity.

**Figure S3b Exercise duration stratified meta-analysis on the association of changes in physical activity with plasma renin activity**

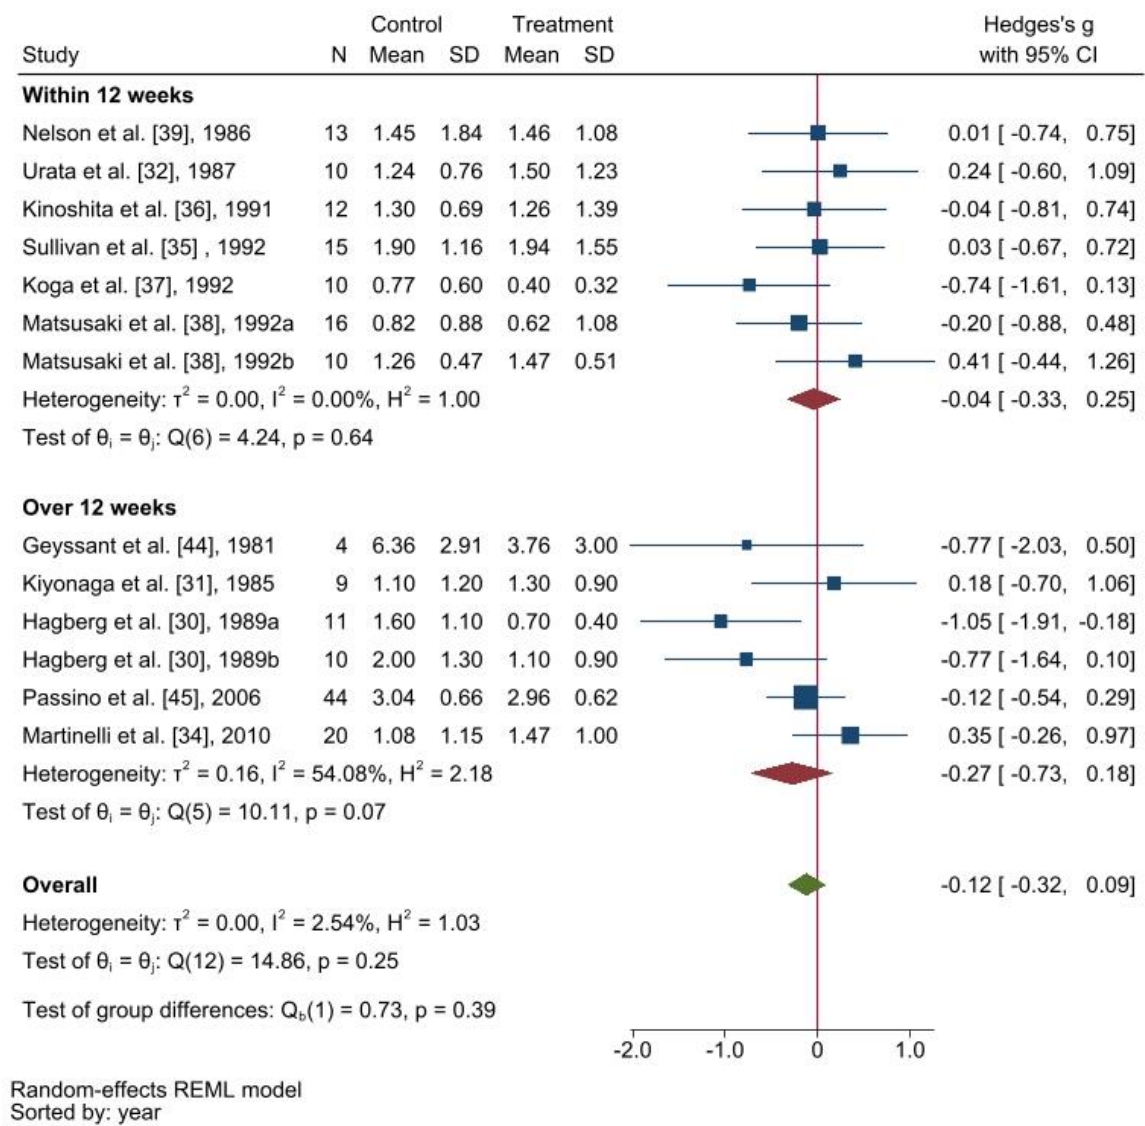

Hagberg *et al.* [30], 1989a: Patients performed low-intensity physical activity.  
Hagberg *et al.* [30], 1989b: Patients performed moderate-intensity physical activity.  
Matsusaki *et al.*[38], 1992a: Patients performed low-workload physical activity.  
Matsusaki *et al.*[38], 1992b: Patients performed high-workload physical activity.

Figure S3c Age stratified meta-analysis on the association of changes in physical activity with plasma renin activity

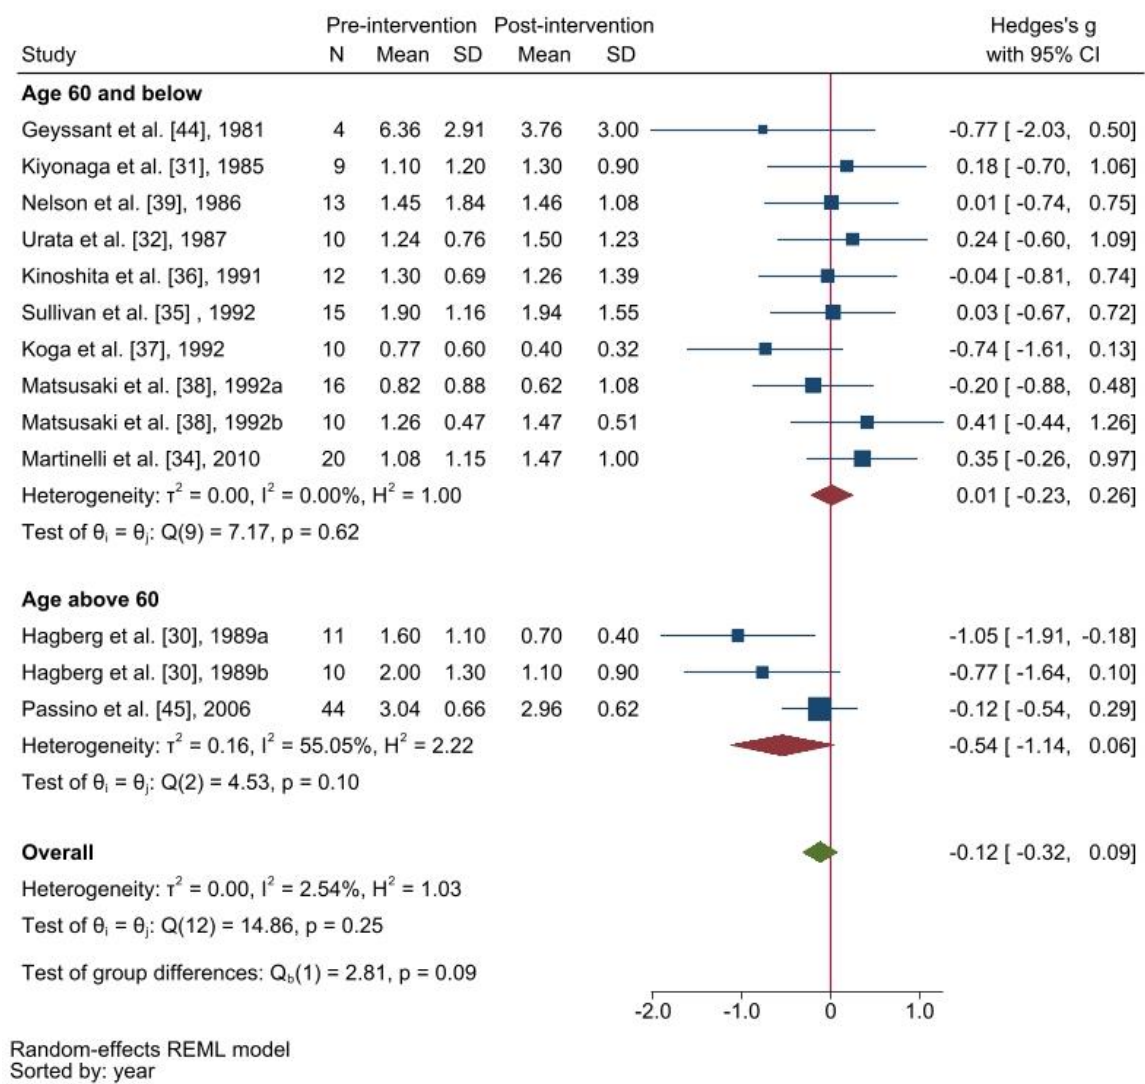

Hagberg *et al.* [30], 1989a: Patients performed low-intensity physical activity.  
Hagberg *et al.* [30], 1989b: Patients performed moderate-intensity physical activity.  
Matsusaki *et al.*[38], 1992a: Patients performed low-workload physical activity.  
Matsusaki *et al.*[38], 1992b: Patients performed high-workload physical activity.

**Figure S3d. Funnel plot of studies on the association of changes in physical activity plasma renin activity**

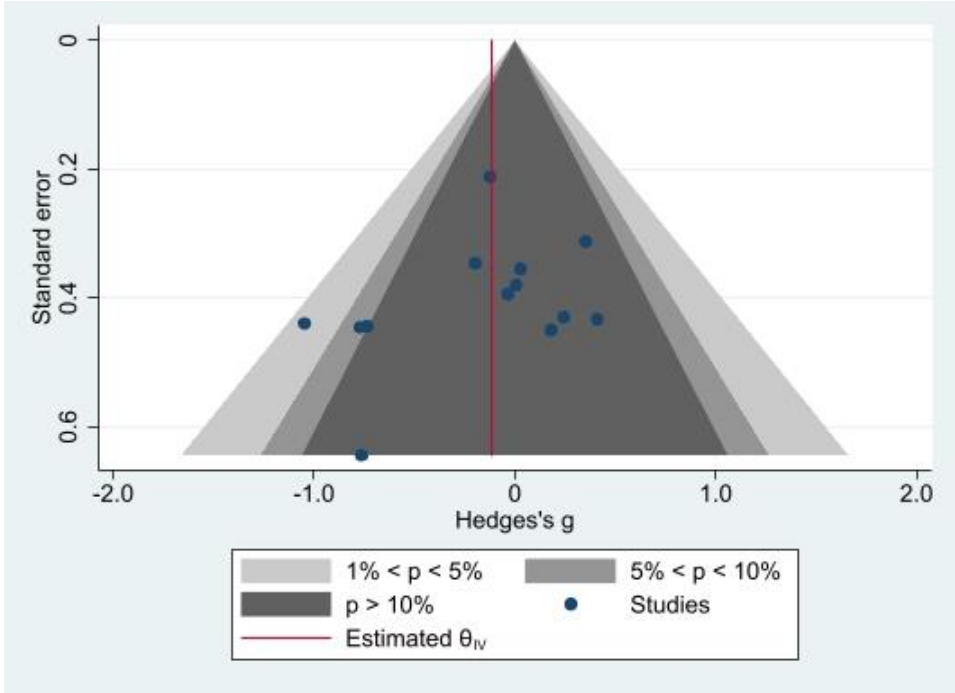

Figure S3e. Leave-one-out figure of studies on the association of changes in physical activity with plasma renin activity

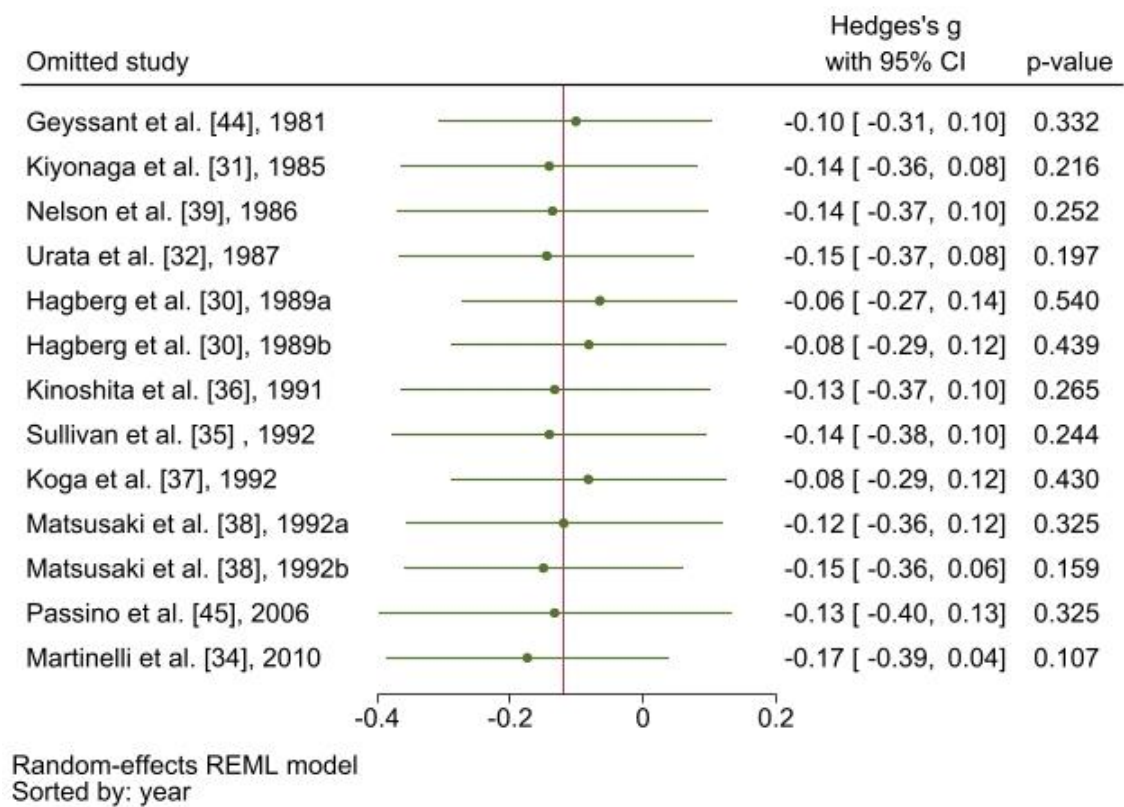

Hagberg *et al.* [30], 1989a: Patients performed low-intensity physical activity.  
Hagberg *et al.* [30], 1989b: Patients performed moderate-intensity physical activity.  
Matsusaki *et al.*[38], 1992a: Patients performed low-workload physical activity.  
Matsusaki *et al.*[38], 1992b: Patients performed high-workload physical activity.

**Figure S3f. Cumulative meta-analysis on the association of changes in physical activity with plasma renin activity**

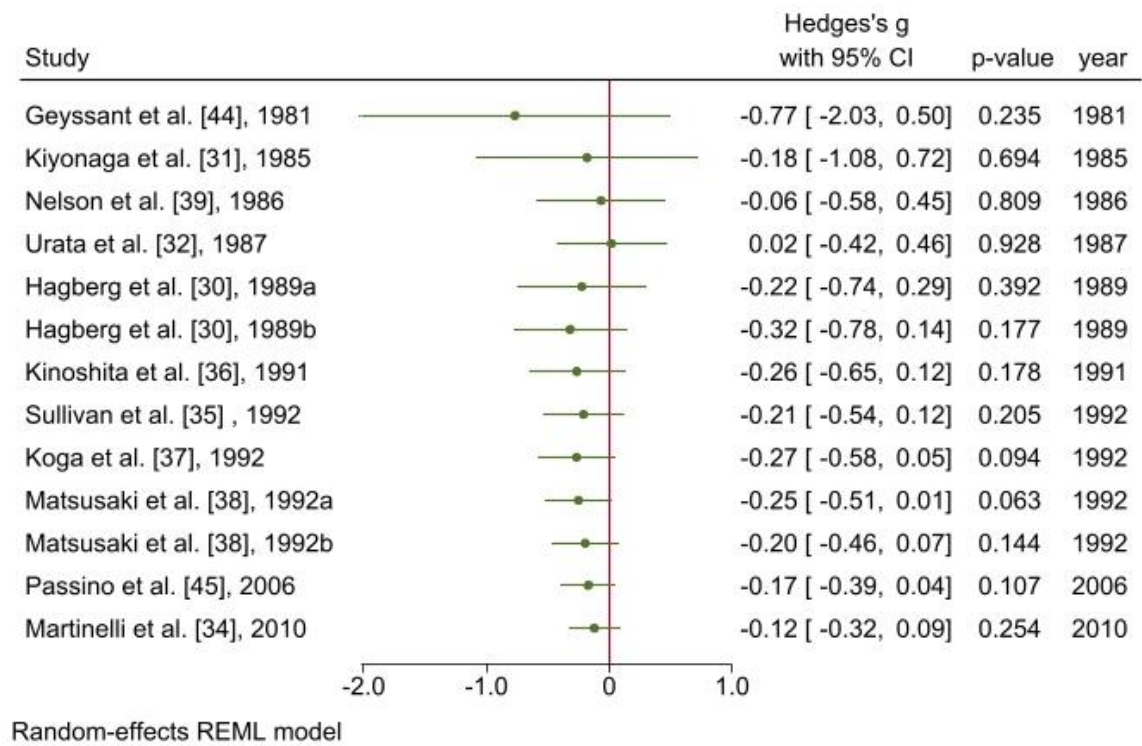

Hagberg *et al.* [30], 1989a: Patients performed low-intensity physical activity.  
Hagberg *et al.* [30], 1989b: Patients performed moderate-intensity physical activity.  
Matsusaki *et al.*[38], 1992a: Patients performed low-workload physical activity.  
Matsusaki *et al.*[38], 1992b: Patients performed high-workload physical activity.



Figure S4a Obesity stratified meta-analysis on the association of changes in physical activity with urea

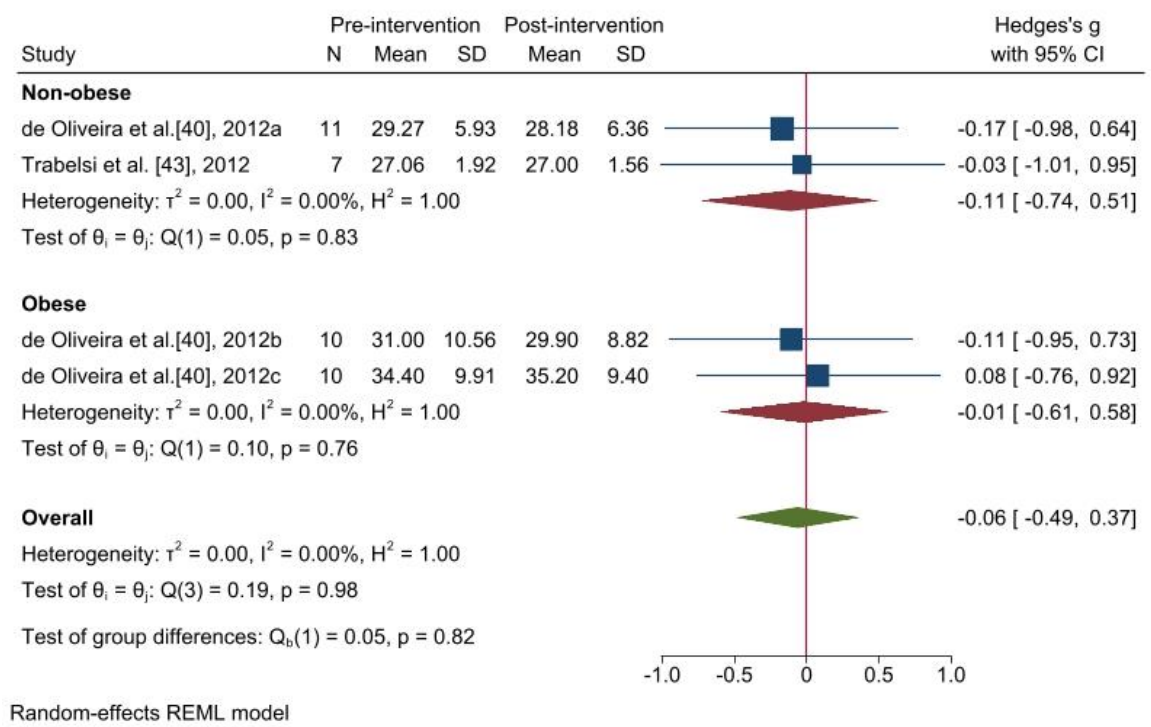

de Oliveira *et al.* [40], 2012a: Patients performed aerobic training.  
de Oliveira *et al.* [40], 2012b: Patients performed strength training.  
de Oliveira *et al.* [40], 2012c: Patients performed aerobic and strength training.

Figure S4b Funnel plot of studies on the association of changes in physical activity with urea

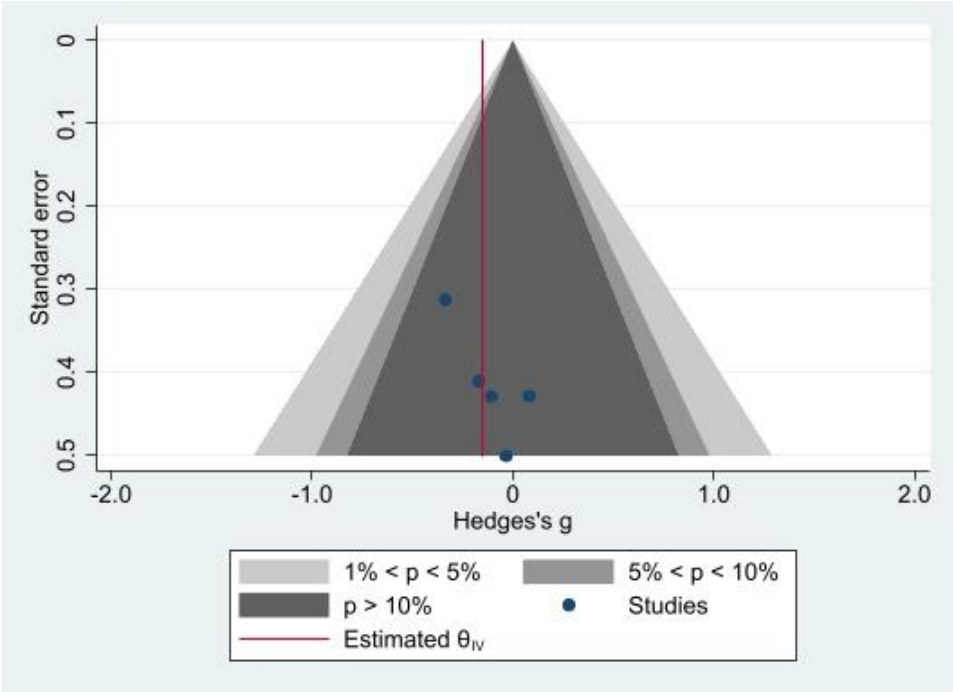

Figure S4c Leave-one-out figure of studies on the association of changes in physical activity with urea

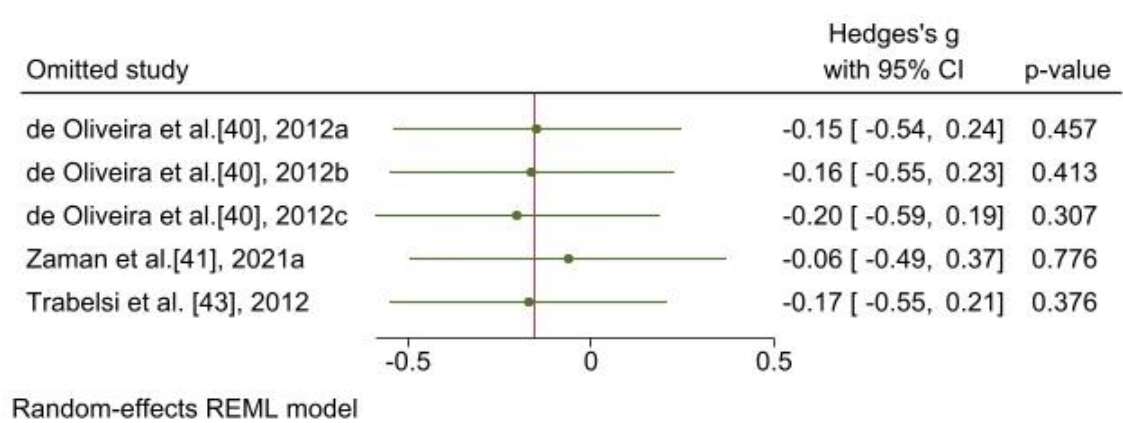

de Oliveira *et al.* [40], 2012a: Patients performed aerobic training.  
de Oliveira *et al.* [40], 2012b: Patients performed strength training.  
de Oliveira *et al.* [40], 2012c: Patients performed aerobic and strength training.  
Zaman *et al.* [41], 2021a: Patients with obesity



Figure S4d Cumulative meta-analysis on the association of changes in physical activity with urea

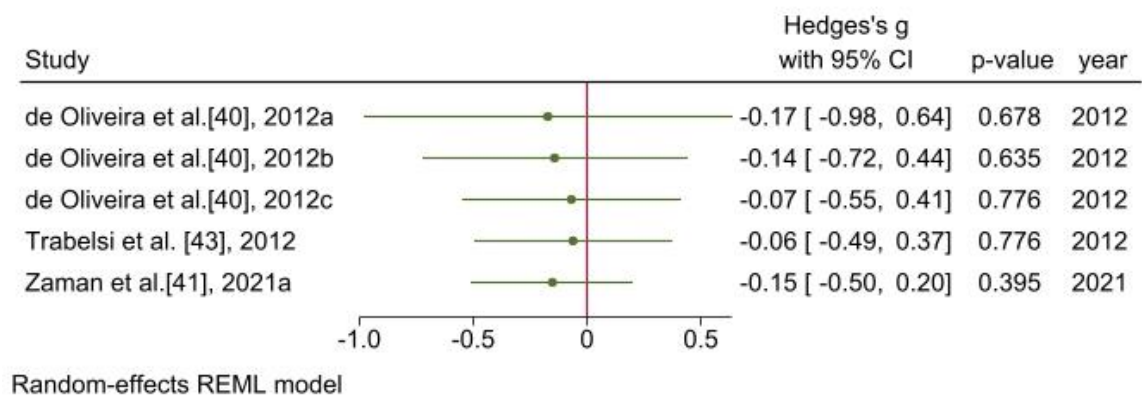

de Oliveira *et al.* [40], 2012a: Patients performed aerobic training.  
de Oliveira *et al.* [40], 2012b: Patients performed strength training.  
de Oliveira *et al.* [40], 2012c: Patients performed aerobic and strength training.  
Zaman *et al.* [41], 2021a: Patients with obesity
